# Supplementary material for: Evolution of microstructures and hydrogen bond interactions within choline amino acid ionic liquid and water mixtures
Source: Royal Society of Chemistry journal article supplement (doi:10.1039/d2cp01990f), 2022-01-01
Supplement: d2cp01990f1.pdf [file d2cp01990f1.pdf]

## Evolution of microstructures and hydrogen bond interactions within choline amino acid ionic liquid and water mixtures

Jin Chen<sup>a</sup>, Xixi Zeng<sup>a</sup>, Ling Chen<sup>a</sup>

<sup>a</sup> Ministry of Education Engineering Research Center of Starch & Protein Processing, Guangdong Province Key Laboratory for Green Processing of Natural Products and Product Safety, School of Food Science and Engineering, South China University of Technology, Guangzhou 510640, China

### Electronic Supplementary Information

#### 1. Effect of temperature on the viscosity of [Cho][AA]-water mixtures with different ratios

The viscosity changes of [Cho][AA]-water mixtures with increased temperature are shown in Fig.S1. It can be seen that the viscosity values of all [Cho][AA]-water mixtures decreased with the increase of temperature. The motion capacities of cations and anions were continuously enhanced by heat energy. As results, intermolecular interactions between [Cho][AA] ions were weakened by heating, and the viscosity values decreased.

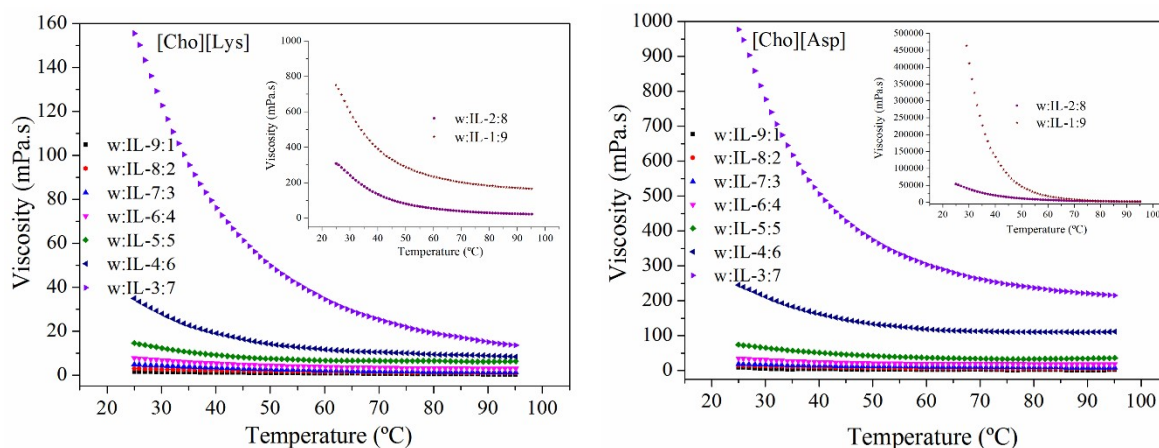

Fig.S1 The effect of temperature on the viscosity of [Cho][AA]-water mixtures with different ratios.

## 2. The spectral assignments of vibration modes of [Cho][AA] ionic liquid (IL)

A pre-request to analyse the vibration frequency shifts of functional groups (-COO<sup>-</sup>, -NH<sub>2</sub> and -COOH) is the correct assignment of vibration modes of [Cho][AA] IL. Here, [Cho][AA] dimer that resembles the real three-dimensional network structure of IL was chosen to make a correct assignment. By calculating the harmony frequency (Table S1-S2), the vibration modes were associated with -NH<sub>2</sub>, -OH, -CH<sub>3</sub>, -CH<sub>2</sub>, -N-(CH<sub>3</sub>)<sub>3</sub>, -COOH and -COO<sup>-</sup> groups of [Cho][AA] IL in ATR-FTIR spectra (Fig.S2). It can be seen from Fig.S2 that asymmetric (3351 cm<sup>-1</sup>, v<sub>as</sub>NH<sub>2</sub>) and symmetric (3277 cm<sup>-1</sup>, v<sub>s</sub>NH<sub>2</sub>) stretching vibration peaks of -NH<sub>2</sub> group only appeared in neat [Cho][Lys] because of the extra residue -NH<sub>2</sub> group of Lys<sup>-</sup>. Yet, the asymmetric vibration peak of -COOH group couldn't be told from the ATR-FTIR spectrum of [Cho][Asp].

Table S1 The assignments of vibration modes of [Cho][Lys] dimer.

| Assignments                                                     | ATR-FTIR spectrum (cm <sup>-1</sup> ) | DFT calculations (cm <sup>-1</sup> )/Intensity      |
|-----------------------------------------------------------------|---------------------------------------|-----------------------------------------------------|
| v <sub>as</sub> α-N2H <sub>2</sub>                              | 3351.02                               | 3389.30 (5); 3383.02 (13)                           |
| v <sub>as</sub> R-N3H <sub>2</sub>                              |                                       | 3400.83 (19); 3361.28 (14)                          |
| v <sub>s</sub> α-N2H <sub>2</sub>                               | 3277.46                               | 3318.90 (1); 3307.64 (16)                           |
| v <sub>s</sub> R-N3H <sub>2</sub>                               |                                       | 3267.72 (94); 3219.30 (117)                         |
| v <sub>s</sub> Cho-OH                                           | 3024.47                               | 3508.90 (387); 2833.95 (795)                        |
| v <sub>as</sub> CH <sub>3</sub>                                 | 2925.79                               | 3014.42 (24); 2996.53 (32)                          |
|                                                                 |                                       | 2935.79 (49); 2933.60 (37);                         |
| v <sub>as</sub> CH <sub>2</sub> +v <sub>s</sub> CH <sub>3</sub> | 2851.00                               | 2927.07 (34); 2917.99 (48);                         |
|                                                                 |                                       | 2915.02 (39); 2914.78 (37);                         |
|                                                                 |                                       | 2909.21 (33); 2903.92 (87)                          |
| v <sub>as</sub> COO <sup>-</sup>                                | 1567.49                               | 1608.85 (633); 1584.82 (401)                        |
| δ <sub>as</sub> CH <sub>3</sub>                                 | 1479.57                               | 1456.25 (39); 1447.94 (33);                         |
|                                                                 |                                       | 1439.09 (33); 1437.64 (43)                          |
| v <sub>s</sub> COO <sup>-</sup>                                 | 1389.21                               | 1380.35 (59); 1345.50 (68)                          |
| δ <sub>as</sub> CH <sub>2</sub> -OH                             | 1083.40                               | 1122.57 (26); 1078.84 (91)                          |
| vN-(CH <sub>3</sub> ) <sub>3</sub>                              | 955.15                                | 946.81 (30); 942.44 (31)                            |
| τNH <sub>2</sub>                                                | 863.92                                | 919.74 (178); 916.74 (88); 896.42 (60); 869.20 (69) |

v<sub>as</sub>: asymmetrical stretching vibration; v<sub>s</sub>: symmetrical stretching vibration; δ<sub>as</sub>: asymmetrical deformation vibration; τ: twisting vibration

Table S2 The assignments of vibration modes of [Cho][Asp] dimer.

| Assignments                            | ATR-FTIR spectrum (cm <sup>-1</sup> ) | DFT calculations (cm <sup>-1</sup> )/Intensity             |
|----------------------------------------|---------------------------------------|------------------------------------------------------------|
| $\nu_{as}\alpha\text{-N}2\text{H}_2$   |                                       | 3401.87 (14); 3390.69 (7)                                  |
| $\nu_s\alpha\text{-N}2\text{H}_2$      |                                       | 3327.01 (6); 3313.77 (4)                                   |
| $\nu_s\text{Cho-OH}$                   | 3027.92                               | 3686.98 (68); 3190.00 (849)                                |
| $\nu_{as}\text{CH}_3$                  | 2955.75                               | 3071.35 (65); 3059.63 (21)                                 |
| $\nu_{as}\text{CH}_2+\nu_s\text{CH}_3$ | 2850.79                               | 2919.54 (28); 2907.97 (23);<br>2896.34 (40); 2870.10 (123) |
| $\nu_{as}\text{R-COOH}$                |                                       | 1684.70 (399); 1647.80 (99)                                |
| $\nu_{as}\text{COO}^-$                 | 1578.93                               | 1599.76 (629); 1581.12 (973)                               |
| $\delta_{as}\text{CH}_3$               | 1476.64                               | 1453.13 (31); 1447.49 (32);<br>1436.15 (48)                |
| $\nu_s\text{COO}^-$                    | 1374.96                               | 1374.07 (135); 1371.65 (183)                               |
| $\nu_s\text{R-COOH}$                   | 1348.00                               | 1331.23 (64); 1309.07 (646)                                |
| $\delta_{as}\text{CH}_2\text{-OH}$     | 1073.39                               | 1123.46 (21); 1070.52 (67)                                 |
| $\nu\text{N-(CH}_3)_3$                 | 955.12                                | 959.31 (29); 942.58 (36)                                   |
| $\tau\text{NH}_2$                      | 855.31                                | 882.02 (129); 863.51 (107)                                 |

$\nu_{as}$ : asymmetrical stretching vibration;  $\nu_s$ : symmetrical stretching vibration;  $\delta_{as}$ : asymmetrical deformation vibration;  $\tau$ : twisting vibration

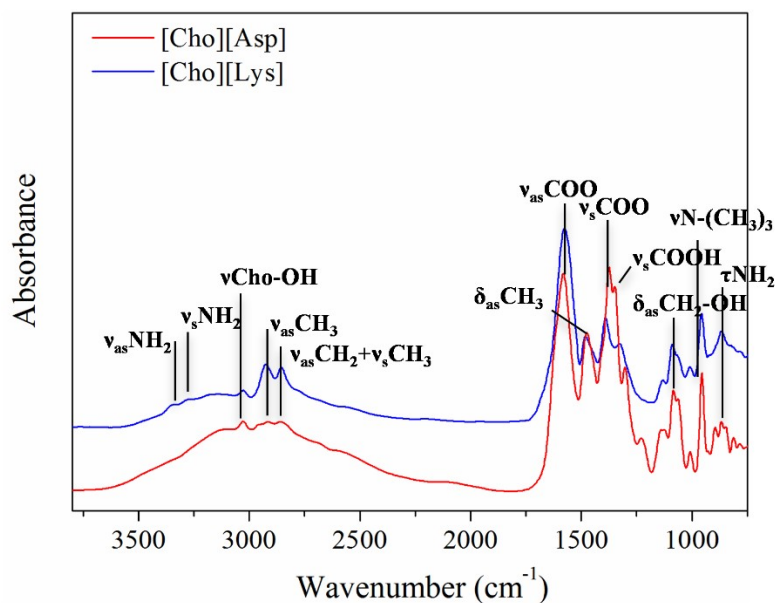

Fig.S2 The spectral assignments of [Cho][Lys] and [Cho][Asp] IL. These assignments were based on the above theoretical frequency calculations of [Cho][AA] dimer.

### 3. Atoms in molecules (AIM) analysis of [Cho][AA]- $n$ H<sub>2</sub>O ( $n=1, 2$ ) complexes

The AIM analysis<sup>1</sup> was used to further identify the nature and strength of hydrogen bond (HB) interactions of tight [Cho][AA] ion pairs with one water molecule and water-separated [Cho][AA] ion pairs in Fig.7 by using Multiwfn 3.8 software.<sup>2</sup> And their bond critical point (BCP) properties of HB interactions are reported in Table S3-S4.

Table S3 Properties of BCP (a.u.) for the interactions of tight [Cho][Lys] ion pairs with one water molecule (G1, G2, G3, G4), water-separated [Cho][Lys] ion pairs (G5, G6) in Fig.7, and the number ( $N_{\text{HB}}$ ), length ( $L_{\text{HB}}$ , Å) and bond angle (deg) of HBs.

|                                                                   | $N_{\text{HB}}$ | Range $L_{\text{HB}}$ | Bond angle    | Total $\rho_{\text{BCP}}$ | Range $\rho_{\text{BCP}}$ | Range $\nabla^2\rho$ | Range $G(r)$ | Range $V(r)$  | Range $H(r)$ |
|-------------------------------------------------------------------|-----------------|-----------------------|---------------|---------------------------|---------------------------|----------------------|--------------|---------------|--------------|
| <b>G1</b>                                                         |                 |                       |               |                           |                           |                      |              |               |              |
| <b>Cho<sup>+</sup>+H<sub>2</sub>O</b>                             |                 |                       |               |                           |                           |                      |              |               |              |
| O <sub>H<sub>2</sub>O</sub> -H(CH <sub>Cho</sub> )                | 2               | 2.53~2.58             | 104.05~107.64 | 0.019                     | 0.009~0.010               | 0.038~0.038          | 0.008        | -0.007~-0.006 | 0.001~0.002  |
| <b>Lys<sup>-</sup>+H<sub>2</sub>O</b>                             |                 |                       |               |                           |                           |                      |              |               |              |
| O <sub>COO</sub> -H(O <sub>H<sub>2</sub>O</sub> H)                | 1               | 1.76                  | 165.02        | 0.036                     | 0.036                     | 0.134                | 0.034        | -0.034        | 0.000        |
| <b>Cho<sup>+</sup>+Lys<sup>-</sup></b>                            |                 |                       |               |                           |                           |                      |              |               |              |
| O <sub>COO</sub> -H(O1H <sub>Cho</sub> )                          | 1               | 1.77                  | 165.78        | 0.035                     | 0.035                     | 0.130                | 0.032        | -0.032        | 0.000        |
| O <sub>COO</sub> -H(CH <sub>Cho</sub> )                           | 3               | 2.22~2.46             | 140.66~149.91 | 0.040                     | 0.011~0.016               | 0.036~0.057          | 0.008~0.012  | -0.012~-0.007 | 0.001~0.002  |
| N <sub>2</sub> <sub>Lys</sub> <sup>-</sup> -H(CH <sub>Cho</sub> ) | 2               | 2.70~2.87             | 112.54~127.87 | 0.015                     | 0.007~0.008               | 0.020~0.024          | 0.004~0.005  | -0.005~-0.004 | 0.001        |
| Intramolecular HBs                                                |                 |                       |               |                           |                           |                      |              |               |              |

|                                          |   |      |        |       |       |       |       |        |       |
|------------------------------------------|---|------|--------|-------|-------|-------|-------|--------|-------|
| O1 <sub>Cho</sub> -H(CH <sub>Cho</sub> ) | 1 | 2.36 | 107.56 | 0.015 | 0.015 | 0.055 | 0.012 | -0.011 | 0.006 |
| N3 <sub>Lys</sub> -H(CH <sub>Lys</sub> ) | 1 | 2.79 | 117.00 | 0.008 | 0.008 | 0.026 | 0.006 | -0.005 | 0.001 |

## G2

### Cho<sup>+</sup>+H<sub>2</sub>O

|                                          |   |           |               |       |             |             |             |               |             |
|------------------------------------------|---|-----------|---------------|-------|-------------|-------------|-------------|---------------|-------------|
| O1 <sub>Cho</sub> -H(O <sub>H2O</sub> H) | 1 | 1.80      | 148.55        | 0.033 | 0.033       | 0.133       | 0.032       | -0.031        | 0.001       |
| O <sub>H2O</sub> -H(CH <sub>Cho</sub> )  | 2 | 2.32~2.36 | 151.20~154.29 | 0.023 | 0.011~0.012 | 0.039~0.044 | 0.008~0.009 | -0.008~-0.007 | 0.001~0.002 |

### Cho<sup>+</sup>+Lys<sup>-</sup>

|                                          |   |           |               |       |             |             |             |               |        |
|------------------------------------------|---|-----------|---------------|-------|-------------|-------------|-------------|---------------|--------|
| N3 <sub>Lys</sub> -H(CH <sub>Cho</sub> ) | 1 | 2.70      | 125.93        | 0.008 | 0.008       | 0.023       | 0.005       | -0.004        | 0.001  |
| O <sub>COO</sub> -H(O1H <sub>Cho</sub> ) | 1 | 1.59      | 168.05        | 0.058 | 0.058       | 0.153       | 0.050       | -0.062        | -0.012 |
| O <sub>COO</sub> -H(CH <sub>Cho</sub> )  | 3 | 2.13~2.31 | 141.54~147.12 | 0.051 | 0.013~0.020 | 0.045~0.068 | 0.010~0.015 | -0.013~-0.008 | 0.002  |

### Intramolecular HBs

|                                          |   |      |        |       |       |       |       |        |       |
|------------------------------------------|---|------|--------|-------|-------|-------|-------|--------|-------|
| O1 <sub>Cho</sub> -H(CH <sub>Cho</sub> ) | 1 | 2.43 | 106.72 | 0.014 | 0.014 | 0.048 | 0.011 | -0.010 | 0.001 |
|------------------------------------------|---|------|--------|-------|-------|-------|-------|--------|-------|

## G3

### Lys<sup>-</sup>+H<sub>2</sub>O

|                                          |   |           |               |       |             |             |             |               |             |
|------------------------------------------|---|-----------|---------------|-------|-------------|-------------|-------------|---------------|-------------|
| N2 <sub>Lys</sub> -H(O <sub>H2O</sub> H) | 1 | 1.91      | 158.16        | 0.033 | 0.033       | 0.098       | 0.025       | -0.026        | -0.001      |
| O <sub>H2O</sub> -H(CH <sub>Lys</sub> )  | 2 | 2.45~2.66 | 128.11~157.58 | 0.016 | 0.007~0.009 | 0.021~0.038 | 0.005~0.008 | -0.006~-0.004 | 0.001~0.002 |

### Cho<sup>+</sup>+Lys<sup>-</sup>

|                                          |   |           |               |       |             |             |             |               |        |
|------------------------------------------|---|-----------|---------------|-------|-------------|-------------|-------------|---------------|--------|
| O <sub>COO</sub> -H(O1H <sub>Cho</sub> ) | 1 | 1.66      | 168.66        | 0.050 | 0.050       | 0.146       | 0.043       | -0.050        | -0.007 |
| O <sub>COO</sub> -H(CH <sub>Cho</sub> )  | 3 | 2.12~2.21 | 139.76~143.65 | 0.054 | 0.017~0.020 | 0.060~0.071 | 0.013~0.016 | -0.014~-0.012 | 0.002  |

Intramolecular HBs

|                                          |   |      |        |       |       |       |       |        |       |
|------------------------------------------|---|------|--------|-------|-------|-------|-------|--------|-------|
| O <sub>COO</sub> -H(CH)                  | 1 | 2.49 | 126.98 | 0.012 | 0.012 | 0.037 | 0.008 | -0.007 | 0.001 |
| O1 <sub>Cho</sub> -H(CH <sub>Cho</sub> ) | 1 | 2.34 | 107.42 | 0.016 | 0.016 | 0.059 | 0.013 | -0.011 | 0.002 |
| O <sub>COO</sub> -H(N3H <sub>Lys</sub> ) | 1 | 2.16 | 174.11 | 0.017 | 0.017 | 0.060 | 0.013 | -0.012 | 0.002 |

**G4**

**Cho<sup>+</sup>+H<sub>2</sub>O**

|                                         |   |           |               |       |             |             |             |               |             |
|-----------------------------------------|---|-----------|---------------|-------|-------------|-------------|-------------|---------------|-------------|
| O <sub>H2O</sub> -H(CH <sub>Cho</sub> ) | 3 | 2.29~2.35 | 143.87~146.56 | 0.038 | 0.012~0.013 | 0.041~0.047 | 0.009~0.010 | -0.009~-0.008 | 0.001~0.002 |
|-----------------------------------------|---|-----------|---------------|-------|-------------|-------------|-------------|---------------|-------------|

**Lys<sup>-</sup>+H<sub>2</sub>O**

|                                          |   |      |        |       |       |       |       |        |        |
|------------------------------------------|---|------|--------|-------|-------|-------|-------|--------|--------|
| O <sub>H2O</sub> -H(N3H <sub>Lys</sub> ) | 1 | 1.75 | 167.92 | 0.048 | 0.048 | 0.103 | 0.035 | -0.043 | -0.009 |
|------------------------------------------|---|------|--------|-------|-------|-------|-------|--------|--------|

**Cho<sup>+</sup>+Lys<sup>-</sup>**

|                                          |   |           |               |       |             |             |             |               |             |
|------------------------------------------|---|-----------|---------------|-------|-------------|-------------|-------------|---------------|-------------|
| N3 <sub>Lys</sub> -H(CH <sub>Cho</sub> ) | 1 | 2.81      | 115.04        | 0.006 | 0.006       | 0.0219      | 0.0047      | -0.0039       | 0.001       |
| O <sub>COO</sub> -H(O1H <sub>Cho</sub> ) | 1 | 1.65      | 167.46        | 0.050 | 0.050       | 0.150       | 0.044       | -0.050        | -0.006      |
| O <sub>COO</sub> -H(CH <sub>Cho</sub> )  | 3 | 2.10~2.49 | 141.44~150.86 | 0.044 | 0.011~0.019 | 0.031~0.074 | 0.007~0.016 | -0.013~-0.007 | 0.001~0.003 |

Intramolecular HBs

|                                          |   |      |        |       |       |       |       |        |       |
|------------------------------------------|---|------|--------|-------|-------|-------|-------|--------|-------|
| O <sub>COO</sub> -H(N3H <sub>Lys</sub> ) | 1 | 2.03 | 171.09 | 0.021 | 0.021 | 0.078 | 0.017 | -0.015 | 0.002 |
|------------------------------------------|---|------|--------|-------|-------|-------|-------|--------|-------|

|                        |   |      |        |       |       |       |       |        |       |
|------------------------|---|------|--------|-------|-------|-------|-------|--------|-------|
| $O_{COO}-H(N2H_{Lys})$ | 1 | 2.20 | 112.16 | 0.020 | 0.020 | 0.087 | 0.019 | -0.016 | 0.003 |
|------------------------|---|------|--------|-------|-------|-------|-------|--------|-------|

**G5**

**Cho<sup>+</sup>+H<sub>2</sub>O**

|                        |   |      |        |       |       |       |       |        |        |
|------------------------|---|------|--------|-------|-------|-------|-------|--------|--------|
| $O_{H2O}-H(O1H_{Lys})$ | 1 | 1.71 | 163.36 | 0.043 | 0.043 | 0.146 | 0.039 | -0.042 | -0.003 |
|------------------------|---|------|--------|-------|-------|-------|-------|--------|--------|

|                       |   |      |        |       |       |       |       |        |       |
|-----------------------|---|------|--------|-------|-------|-------|-------|--------|-------|
| $O_{H2O}-H(CH_{Lys})$ | 1 | 2.63 | 112.78 | 0.008 | 0.008 | 0.030 | 0.006 | -0.005 | 0.001 |
|-----------------------|---|------|--------|-------|-------|-------|-------|--------|-------|

**Lys<sup>-</sup>+H<sub>2</sub>O**

|                       |   |      |        |       |       |       |       |        |        |
|-----------------------|---|------|--------|-------|-------|-------|-------|--------|--------|
| $O_{COO}-H(O_{H2O}H)$ | 1 | 1.57 | 178.66 | 0.061 | 0.061 | 0.159 | 0.053 | -0.066 | -0.013 |
|-----------------------|---|------|--------|-------|-------|-------|-------|--------|--------|

**Cho<sup>+</sup>+Lys<sup>-</sup>**

|                       |   |           |               |       |             |             |             |               |             |
|-----------------------|---|-----------|---------------|-------|-------------|-------------|-------------|---------------|-------------|
| $O_{COO}-H(CH_{Lys})$ | 4 | 2.06~2.38 | 133.34~168.92 | 0.066 | 0.013~0.020 | 0.042~0.082 | 0.009~0.018 | -0.015~-0.008 | 0.001~0.003 |
|-----------------------|---|-----------|---------------|-------|-------------|-------------|-------------|---------------|-------------|

**Intramolecular HBs**

|                        |   |           |               |       |             |             |             |        |             |
|------------------------|---|-----------|---------------|-------|-------------|-------------|-------------|--------|-------------|
| $O1_{Lys}-H(CH_{Lys})$ | 2 | 2.32~2.38 | 121.01~124.01 | 0.028 | 0.013~0.015 | 0.047~0.051 | 0.010~0.011 | -0.010 | 0.001~0.002 |
|------------------------|---|-----------|---------------|-------|-------------|-------------|-------------|--------|-------------|

**G6**

**Cho<sup>+</sup>+H<sub>2</sub>O**

|                        |   |      |        |       |       |       |       |        |        |
|------------------------|---|------|--------|-------|-------|-------|-------|--------|--------|
| $O_{H2O}-H(O1H_{Cho})$ | 1 | 1.74 | 159.98 | 0.040 | 0.040 | 0.137 | 0.036 | -0.038 | -0.002 |
|------------------------|---|------|--------|-------|-------|-------|-------|--------|--------|

|                       |   |           |               |       |       |             |             |               |             |
|-----------------------|---|-----------|---------------|-------|-------|-------------|-------------|---------------|-------------|
| $O_{H2O}-H(CH_{Cho})$ | 3 | 2.36~2.46 | 147.85~171.32 | 0.030 | 0.010 | 0.031~0.040 | 0.007~0.008 | -0.007~-0.006 | 0.001~0.002 |
|-----------------------|---|-----------|---------------|-------|-------|-------------|-------------|---------------|-------------|

**Lys<sup>-</sup>+H<sub>2</sub>O**

|                       |   |           |               |       |             |             |             |               |        |
|-----------------------|---|-----------|---------------|-------|-------------|-------------|-------------|---------------|--------|
| $O_{COO}-H(O_{H2O}H)$ | 2 | 1.61~1.76 | 167.08~173.88 | 0.047 | 0.038~0.056 | 0.130~0.153 | 0.034~0.048 | -0.058~-0.035 | -0.001 |
|-----------------------|---|-----------|---------------|-------|-------------|-------------|-------------|---------------|--------|

**Cho<sup>+</sup>Lys<sup>-</sup>**

|                                         |   |           |               |       |             |             |             |               |       |
|-----------------------------------------|---|-----------|---------------|-------|-------------|-------------|-------------|---------------|-------|
| O <sub>COO</sub> -H(CH <sub>Cho</sub> ) | 3 | 2.46~2.61 | 110.35~119.42 | 0.031 | 0.009~0.011 | 0.030~0.041 | 0.007~0.009 | -0.008~-0.006 | 0.001 |
|-----------------------------------------|---|-----------|---------------|-------|-------------|-------------|-------------|---------------|-------|

|                                          |   |      |        |       |       |       |       |        |       |
|------------------------------------------|---|------|--------|-------|-------|-------|-------|--------|-------|
| N <sub>3Lys</sub> -H(CH <sub>Cho</sub> ) | 1 | 2.28 | 177.41 | 0.016 | 0.016 | 0.050 | 0.011 | -0.009 | 0.002 |
|------------------------------------------|---|------|--------|-------|-------|-------|-------|--------|-------|

**Intramolecular HBs**

|                                         |   |      |        |       |       |       |       |        |       |
|-----------------------------------------|---|------|--------|-------|-------|-------|-------|--------|-------|
| O <sub>COO</sub> -H(CH <sub>Lys</sub> ) | 1 | 2.64 | 141.60 | 0.008 | 0.008 | 0.026 | 0.006 | -0.005 | 0.001 |
|-----------------------------------------|---|------|--------|-------|-------|-------|-------|--------|-------|

|                                          |   |      |        |       |       |       |       |        |       |
|------------------------------------------|---|------|--------|-------|-------|-------|-------|--------|-------|
| O <sub>1Cho</sub> -H(CH <sub>Cho</sub> ) | 1 | 2.49 | 106.93 | 0.012 | 0.012 | 0.044 | 0.010 | -0.008 | 0.001 |
|------------------------------------------|---|------|--------|-------|-------|-------|-------|--------|-------|

Table S4 Properties of BCP (a.u.) for the interactions of tight [Cho][Asp] ion pairs with one water molecule (H1, H2, H3, H4) and water-separated [Cho][Asp] ion pairs (H5, H6) in Fig.7, and the number ( $N_{\text{HB}}$ ), length ( $L_{\text{HB}}$ , Å) and bond angle (deg) of HBs.

|                                                    | $N_{\text{HB}}$ | Range $L_{\text{HB}}$ | Bond angle    | Total $\rho_{\text{BCP}}$ | Range $\rho_{\text{BCP}}$ | Range $\nabla^2\rho$ | Range $G(r)$ | Range $V(r)$  | Range $H(r)$ |
|----------------------------------------------------|-----------------|-----------------------|---------------|---------------------------|---------------------------|----------------------|--------------|---------------|--------------|
| <b>H1</b>                                          |                 |                       |               |                           |                           |                      |              |               |              |
| <b>Cho<sup>+</sup>+H<sub>2</sub>O</b>              |                 |                       |               |                           |                           |                      |              |               |              |
| O <sub>H<sub>2</sub>O</sub> -H(CH <sub>Cho</sub> ) | 2               | 2.48~2.86             | 110.08~123.66 | 0.016                     | 0.006~0.010               | 0.021~0.037          | 0.004~0.008  | -0.007~-0.004 | 0.001        |
| <b>Asp<sup>+</sup>+H<sub>2</sub>O</b>              |                 |                       |               |                           |                           |                      |              |               |              |
| O <sub>COO</sub> -H(O <sub>H<sub>2</sub>O</sub> H) | 1               | 1.81                  | 164.72        | 0.030                     | 0.030                     | 0.123                | 0.029        | -0.027        | 0.002        |
| <b>Cho<sup>+</sup>+Asp<sup>-</sup></b>             |                 |                       |               |                           |                           |                      |              |               |              |
| O <sub>COO</sub> -H(O <sub>1H</sub> Cho)           | 1               | 1.82                  | 151.04        | 0.033                     | 0.033                     | 0.124                | 0.031        | -0.030        | 0.000        |



|                                          |   |           |               |       |             |             |             |               |             |
|------------------------------------------|---|-----------|---------------|-------|-------------|-------------|-------------|---------------|-------------|
| O <sub>COO</sub> -H(CH <sub>Cho</sub> )  | 3 | 2.14~2.35 | 163.48~175.08 | 0.046 | 0.014~0.018 | 0.047~0.063 | 0.010~0.014 | -0.009~-0.012 | 0.001~0.002 |
| N2 <sub>Asp</sub> -H(CH <sub>Cho</sub> ) | 1 | 2.79      | 121.73        | 0.007 | 0.007       | 0.022       | 0.005       | -0.004        | 0.001       |

Intramolecular HBs

|                                           |   |      |        |       |       |       |       |        |       |
|-------------------------------------------|---|------|--------|-------|-------|-------|-------|--------|-------|
| O1 <sub>Cho</sub> -H(CH <sub>Cho</sub> )  | 1 | 2.50 | 100.23 | 0.013 | 0.013 | 0.049 | 0.011 | -0.009 | 0.001 |
| O5 <sub>Asp</sub> -H(N2H <sub>Asp</sub> ) | 1 | 2.35 | 122.74 | 0.013 | 0.013 | 0.046 | 0.010 | -0.009 | 0.001 |

**H2**

**Cho<sup>+</sup>+H<sub>2</sub>O**

|                                          |   |           |               |       |        |             |       |        |        |
|------------------------------------------|---|-----------|---------------|-------|--------|-------------|-------|--------|--------|
| O1 <sub>Cho</sub> -H(O <sub>H2O</sub> H) | 1 | 1.78      | 158.38        | 0.036 | 0.0361 | 0.133       | 0.033 | -0.033 | -0.000 |
| O <sub>H2O</sub> -H(CH <sub>Cho</sub> )  | 2 | 2.28~2.31 | 130.78~143.01 | 0.026 | 0.013  | 0.048~0.048 | 0.010 | -0.008 | 0.002  |

**Cho<sup>+</sup>+Asp<sup>-</sup>**

|                                          |   |           |               |       |             |             |             |               |             |
|------------------------------------------|---|-----------|---------------|-------|-------------|-------------|-------------|---------------|-------------|
| O <sub>COO</sub> -H(O1H <sub>Cho</sub> ) | 1 | 1.55      | 170.21        | 0.067 | 0.067       | 0.149       | 0.055       | -0.073        | -0.018      |
| O <sub>COO</sub> -H(CH <sub>Cho</sub> )  | 3 | 2.05~2.20 | 146.16~175.21 | 0.056 | 0.018~0.021 | 0.058~0.078 | 0.013~0.017 | -0.014~-0.011 | 0.002~0.003 |
| O5 <sub>Asp</sub> -H(CH <sub>Cho</sub> ) | 1 | 2.70      | 112.43        | 0.006 | 0.006       | 0.024       | 0.005       | -0.004        | 0.001       |

Intramolecular HBs

|                                           |   |      |        |       |       |       |       |        |       |
|-------------------------------------------|---|------|--------|-------|-------|-------|-------|--------|-------|
| O1 <sub>Cho</sub> -H(CH <sub>Cho</sub> )  | 1 | 2.49 | 104.89 | 0.017 | 0.017 | 0.046 | 0.010 | -0.009 | 0.001 |
| O5 <sub>Asp</sub> -H(N2H <sub>Asp</sub> ) | 1 | 2.46 | 118.45 | 0.011 | 0.011 | 0.039 | 0.009 | -0.008 | 0.001 |

**H3**

**Asp+H<sub>2</sub>O**

|                                          |   |      |        |       |       |       |       |        |        |
|------------------------------------------|---|------|--------|-------|-------|-------|-------|--------|--------|
| N2 <sub>Asp</sub> -H(O <sub>H2O</sub> H) | 1 | 1.85 | 172.35 | 0.038 | 0.038 | 0.098 | 0.027 | -0.031 | -0.003 |
|------------------------------------------|---|------|--------|-------|-------|-------|-------|--------|--------|

**Cho<sup>+</sup>+H<sub>2</sub>O**

|                                         |   |      |        |       |       |       |       |        |       |
|-----------------------------------------|---|------|--------|-------|-------|-------|-------|--------|-------|
| O <sub>H2O</sub> -H(CH <sub>Cho</sub> ) | 1 | 2.46 | 108.87 | 0.011 | 0.011 | 0.042 | 0.009 | -0.008 | 0.002 |
|-----------------------------------------|---|------|--------|-------|-------|-------|-------|--------|-------|

**Cho<sup>+</sup>+Asp<sup>-</sup>**

|                                          |   |      |        |       |       |       |       |        |        |
|------------------------------------------|---|------|--------|-------|-------|-------|-------|--------|--------|
| O <sub>COO</sub> -H(O1H <sub>Cho</sub> ) | 1 | 1.73 | 165.65 | 0.036 | 0.036 | 0.139 | 0.036 | -0.038 | -0.002 |
|------------------------------------------|---|------|--------|-------|-------|-------|-------|--------|--------|

|                                         |   |           |               |       |             |             |             |               |       |
|-----------------------------------------|---|-----------|---------------|-------|-------------|-------------|-------------|---------------|-------|
| O <sub>COO</sub> -H(CH <sub>Cho</sub> ) | 3 | 2.05~2.28 | 146.06~161.31 | 0.051 | 0.014~0.022 | 0.048~0.080 | 0.011~0.018 | -0.016~-0.009 | 0.002 |
|-----------------------------------------|---|-----------|---------------|-------|-------------|-------------|-------------|---------------|-------|

## Intramolecular HBs

|                                          |   |      |        |       |       |       |       |        |       |
|------------------------------------------|---|------|--------|-------|-------|-------|-------|--------|-------|
| O1 <sub>Cho</sub> -H(CH <sub>Cho</sub> ) | 1 | 2.39 | 104.75 | 0.015 | 0.015 | 0.055 | 0.012 | -0.011 | 0.002 |
|------------------------------------------|---|------|--------|-------|-------|-------|-------|--------|-------|

|                                           |   |      |        |       |       |       |       |        |       |
|-------------------------------------------|---|------|--------|-------|-------|-------|-------|--------|-------|
| O5 <sub>Asp</sub> -H(N2H <sub>Asp</sub> ) | 1 | 2.29 | 124.01 | 0.014 | 0.014 | 0.052 | 0.011 | -0.010 | 0.002 |
|-------------------------------------------|---|------|--------|-------|-------|-------|-------|--------|-------|

**H4****Asp+H<sub>2</sub>O**

|                                          |   |      |        |       |       |       |       |        |       |
|------------------------------------------|---|------|--------|-------|-------|-------|-------|--------|-------|
| O <sub>H2O</sub> -H(O4H <sub>Asp</sub> ) | 1 | 1.82 | 155.50 | 0.031 | 0.031 | 0.119 | 0.029 | -0.028 | 0.001 |
|------------------------------------------|---|------|--------|-------|-------|-------|-------|--------|-------|

|                                          |   |      |        |       |       |       |       |        |       |
|------------------------------------------|---|------|--------|-------|-------|-------|-------|--------|-------|
| O5 <sub>Asp</sub> -H(O <sub>H2O</sub> H) | 1 | 1.96 | 135.74 | 0.025 | 0.025 | 0.096 | 0.022 | -0.020 | 0.002 |
|------------------------------------------|---|------|--------|-------|-------|-------|-------|--------|-------|

**Cho<sup>+</sup>+Asp<sup>-</sup>**

|                                          |   |      |        |       |       |       |       |        |        |
|------------------------------------------|---|------|--------|-------|-------|-------|-------|--------|--------|
| O <sub>COO</sub> -H(O1H <sub>Cho</sub> ) | 1 | 1.69 | 167.33 | 0.043 | 0.043 | 0.147 | 0.040 | -0.043 | -0.003 |
|------------------------------------------|---|------|--------|-------|-------|-------|-------|--------|--------|

|                                         |   |           |               |       |             |             |             |               |             |
|-----------------------------------------|---|-----------|---------------|-------|-------------|-------------|-------------|---------------|-------------|
| O <sub>COO</sub> -H(CH <sub>Cho</sub> ) | 4 | 2.16~2.41 | 125.37~145.93 | 0.065 | 0.012~0.019 | 0.044~0.064 | 0.010~0.014 | -0.013~-0.008 | 0.001~0.002 |
|-----------------------------------------|---|-----------|---------------|-------|-------------|-------------|-------------|---------------|-------------|

Intramolecular HBs

|                                           |   |      |        |       |       |       |       |        |       |
|-------------------------------------------|---|------|--------|-------|-------|-------|-------|--------|-------|
| O1 <sub>Cho</sub> -H(CH <sub>Cho</sub> )  | 1 | 2.26 | 114.75 | 0.018 | 0.018 | 0.064 | 0.014 | -0.012 | 0.002 |
| O5 <sub>Asp</sub> -H(N2H <sub>Asp</sub> ) | 1 | 2.39 | 120.52 | 0.012 | 0.012 | 0.044 | 0.010 | -0.009 | 0.001 |

**H5**

**Cho<sup>+</sup>+H<sub>2</sub>O**

|                                          |   |      |        |       |       |       |       |        |        |
|------------------------------------------|---|------|--------|-------|-------|-------|-------|--------|--------|
| O <sub>H2O</sub> -H(O1H <sub>Cho</sub> ) | 1 | 1.71 | 162.85 | 0.042 | 0.042 | 0.148 | 0.039 | -0.042 | -0.003 |
| O <sub>H2O</sub> -H(CH <sub>Cho</sub> )  | 1 | 2.64 | 112.77 | 0.008 | 0.008 | 0.029 | 0.006 | -0.005 | 0.001  |

**Asp<sup>-</sup>+H<sub>2</sub>O**

|                                         |   |      |        |       |       |       |       |        |        |
|-----------------------------------------|---|------|--------|-------|-------|-------|-------|--------|--------|
| O <sub>COO</sub> -H(O <sub>H2O</sub> H) | 1 | 1.58 | 177.56 | 0.059 | 0.059 | 0.159 | 0.052 | -0.064 | -0.012 |
|-----------------------------------------|---|------|--------|-------|-------|-------|-------|--------|--------|

**Cho<sup>+</sup>+Asp<sup>-</sup>**

|                                         |    |           |               |       |             |             |             |               |             |
|-----------------------------------------|----|-----------|---------------|-------|-------------|-------------|-------------|---------------|-------------|
| O <sub>COO</sub> -H(CH <sub>Cho</sub> ) | 41 | 2.05~2.35 | 133.00~169.36 | 0.064 | 0.014~0.020 | 0.044~0.084 | 0.010~0.018 | -0.015~-0.009 | 0.001~0.003 |
|-----------------------------------------|----|-----------|---------------|-------|-------------|-------------|-------------|---------------|-------------|

Intramolecular HBs

|                                           |    |           |               |       |             |             |             |               |             |
|-------------------------------------------|----|-----------|---------------|-------|-------------|-------------|-------------|---------------|-------------|
| O1 <sub>Cho</sub> -H(CH <sub>Cho</sub> )  | 2  | 2.33~2.38 | 121.10~123.97 | 0.027 | 0.013~0.014 | 0.048~0.050 | 0.010~0.011 | -0.010~-0.009 | 0.001~0.002 |
| O5 <sub>Asp</sub> -H(N2H <sub>Asp</sub> ) | 88 | 2.40      | 120.88        | 0.012 | 0.012       | 0.043       | 0.009       | -0.008        | 0.001       |

**H6**

**Cho<sup>+</sup>+H<sub>2</sub>O**

|                                          |   |      |        |       |       |       |       |        |        |
|------------------------------------------|---|------|--------|-------|-------|-------|-------|--------|--------|
| O <sub>H2O</sub> -H(O1H <sub>Cho</sub> ) | 1 | 1.79 | 157.05 | 0.037 | 0.037 | 0.126 | 0.033 | -0.033 | -0.001 |
|------------------------------------------|---|------|--------|-------|-------|-------|-------|--------|--------|

|                                        |   |           |               |       |             |             |             |               |                  |
|----------------------------------------|---|-----------|---------------|-------|-------------|-------------|-------------|---------------|------------------|
| $O_{H_2O}-H(CH_{Cho})$                 | 3 | 2.40~2.66 | 113.57~121.25 | 0.029 | 0.008~0.011 | 0.026~0.047 | 0.006~0.010 | -0.008~-0.005 | 0.001~0.002      |
| <b>Asp<sup>-</sup>+H<sub>2</sub>O</b>  |   |           |               |       |             |             |             |               |                  |
| $O_{COO}-H(O_{H_2O}H)$                 | 2 | 1.69~1.82 | 164.98~172.19 | 0.076 | 0.032~0.044 | 0.120~0.142 | 0.029~0.039 | -0.043~-0.028 | -<br>0.004~0.001 |
| <b>Cho<sup>+</sup>+Asp<sup>-</sup></b> |   |           |               |       |             |             |             |               |                  |
| $O_{COO}-H(CH_{Cho})$                  | 4 | 2.15~2.55 | 136.10~162.97 | 0.049 | 0.009~0.017 | 0.029~0.062 | 0.007~0.013 | -0.011~-0.006 | 0.001~0.002      |
| $O5_{Asp}-H(CH_{Cho})$                 | 2 | 2.61~2.64 | 103.56~109.47 | 0.017 | 0.008~0.009 | 0.028~0.036 | 0.006~0.008 | -0.006~-0.005 | 0.001            |
| Intramolecular HBs                     |   |           |               |       |             |             |             |               |                  |
| $O1_{Cho}-H(CH_{Cho})$                 | 1 | 2.27      | 122.33        | 0.017 | 0.017       | 0.057       | 0.013       | -0.011        | 0.002            |
| $O5_{Asp}-H(N2H_{Asp})$                | 1 | 2.36      | 122.43        | 0.013 | 0.013       | 0.045       | 0.010       | -0.009        | 0.001            |

---

#### 4. The effect of mixture ratio on the vibration modes of $-NH_2$ group in [Cho][AA]-water mixtures

Fig.S3 shows the ATR-FTIR spectra (a) and second derivative spectra (b) of [Cho][AA]-water mixtures within the range of  $3800\sim 2750\text{ cm}^{-1}$ . For  $-NH_2$  group, when water was added to [Cho][Lys], both asymmetric ( $\nu_{as}NH_2$ ) and symmetric ( $\nu_sNH_2$ ) stretching vibrations of  $-NH_2$  group moved to high wavenumbers, showing a blue shift phenomenon. Yet, these  $\nu_{as}NH_2$  and  $\nu_sNH_2$  disappeared and were masked at high water amount ( $w:IL \geq 7:3$ ).

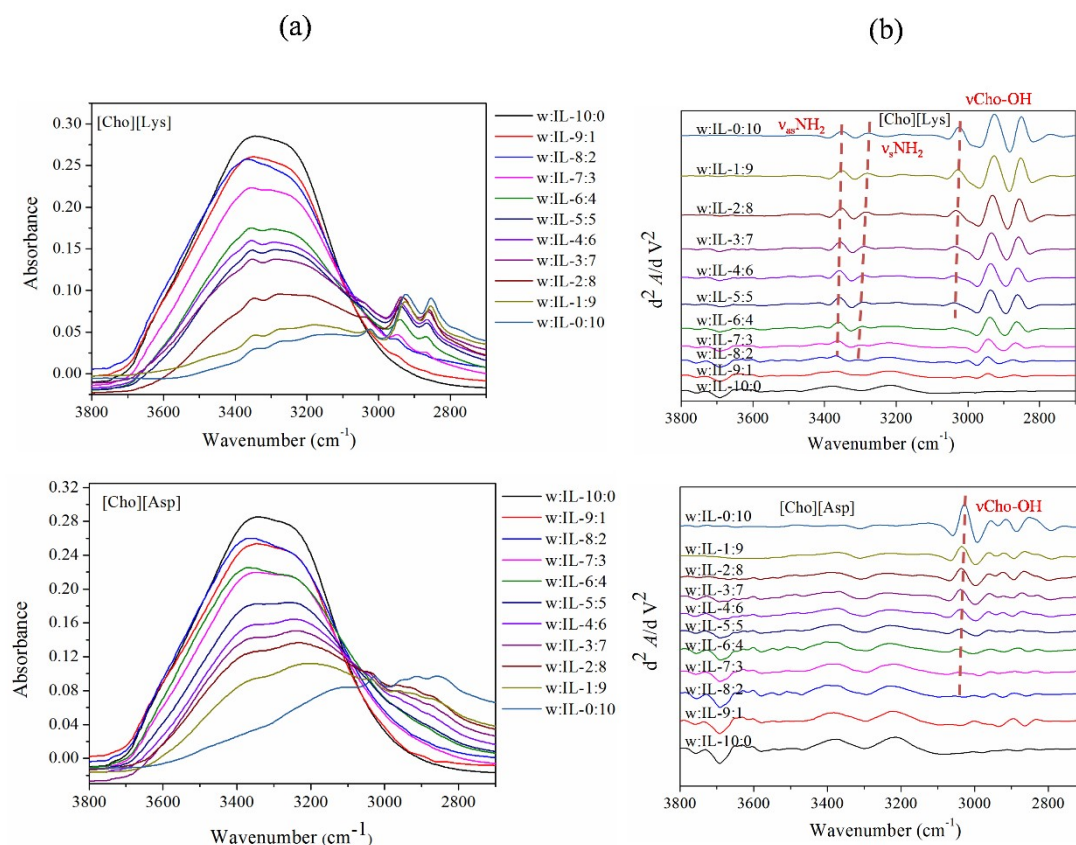

Fig.S3 The ATR-FTIR spectra (a) and second derivative spectra (b) of [Cho][AA]-water mixtures within the range of  $3800\text{-}2750\text{ cm}^{-1}$ .

#### References

1. R. F. W. Bader and C. F. Matta, *Foundations of Chemistry*, 2013, **15**, 253-276.
2. T. Lu and F. Chen, *Journal of Computational Chemistry*, 2012, **33**, 580-592.
